# Supplementary figures and images for: Genomics Reveals the Metabolic Potential and Functions in the Redistribution of Dissolved Organic Matter in Marine Environments of the Genus Thalassotalea
Source: MDPI journal article supplement (doi:10.3390/microorganisms8091412), 2020-09-14

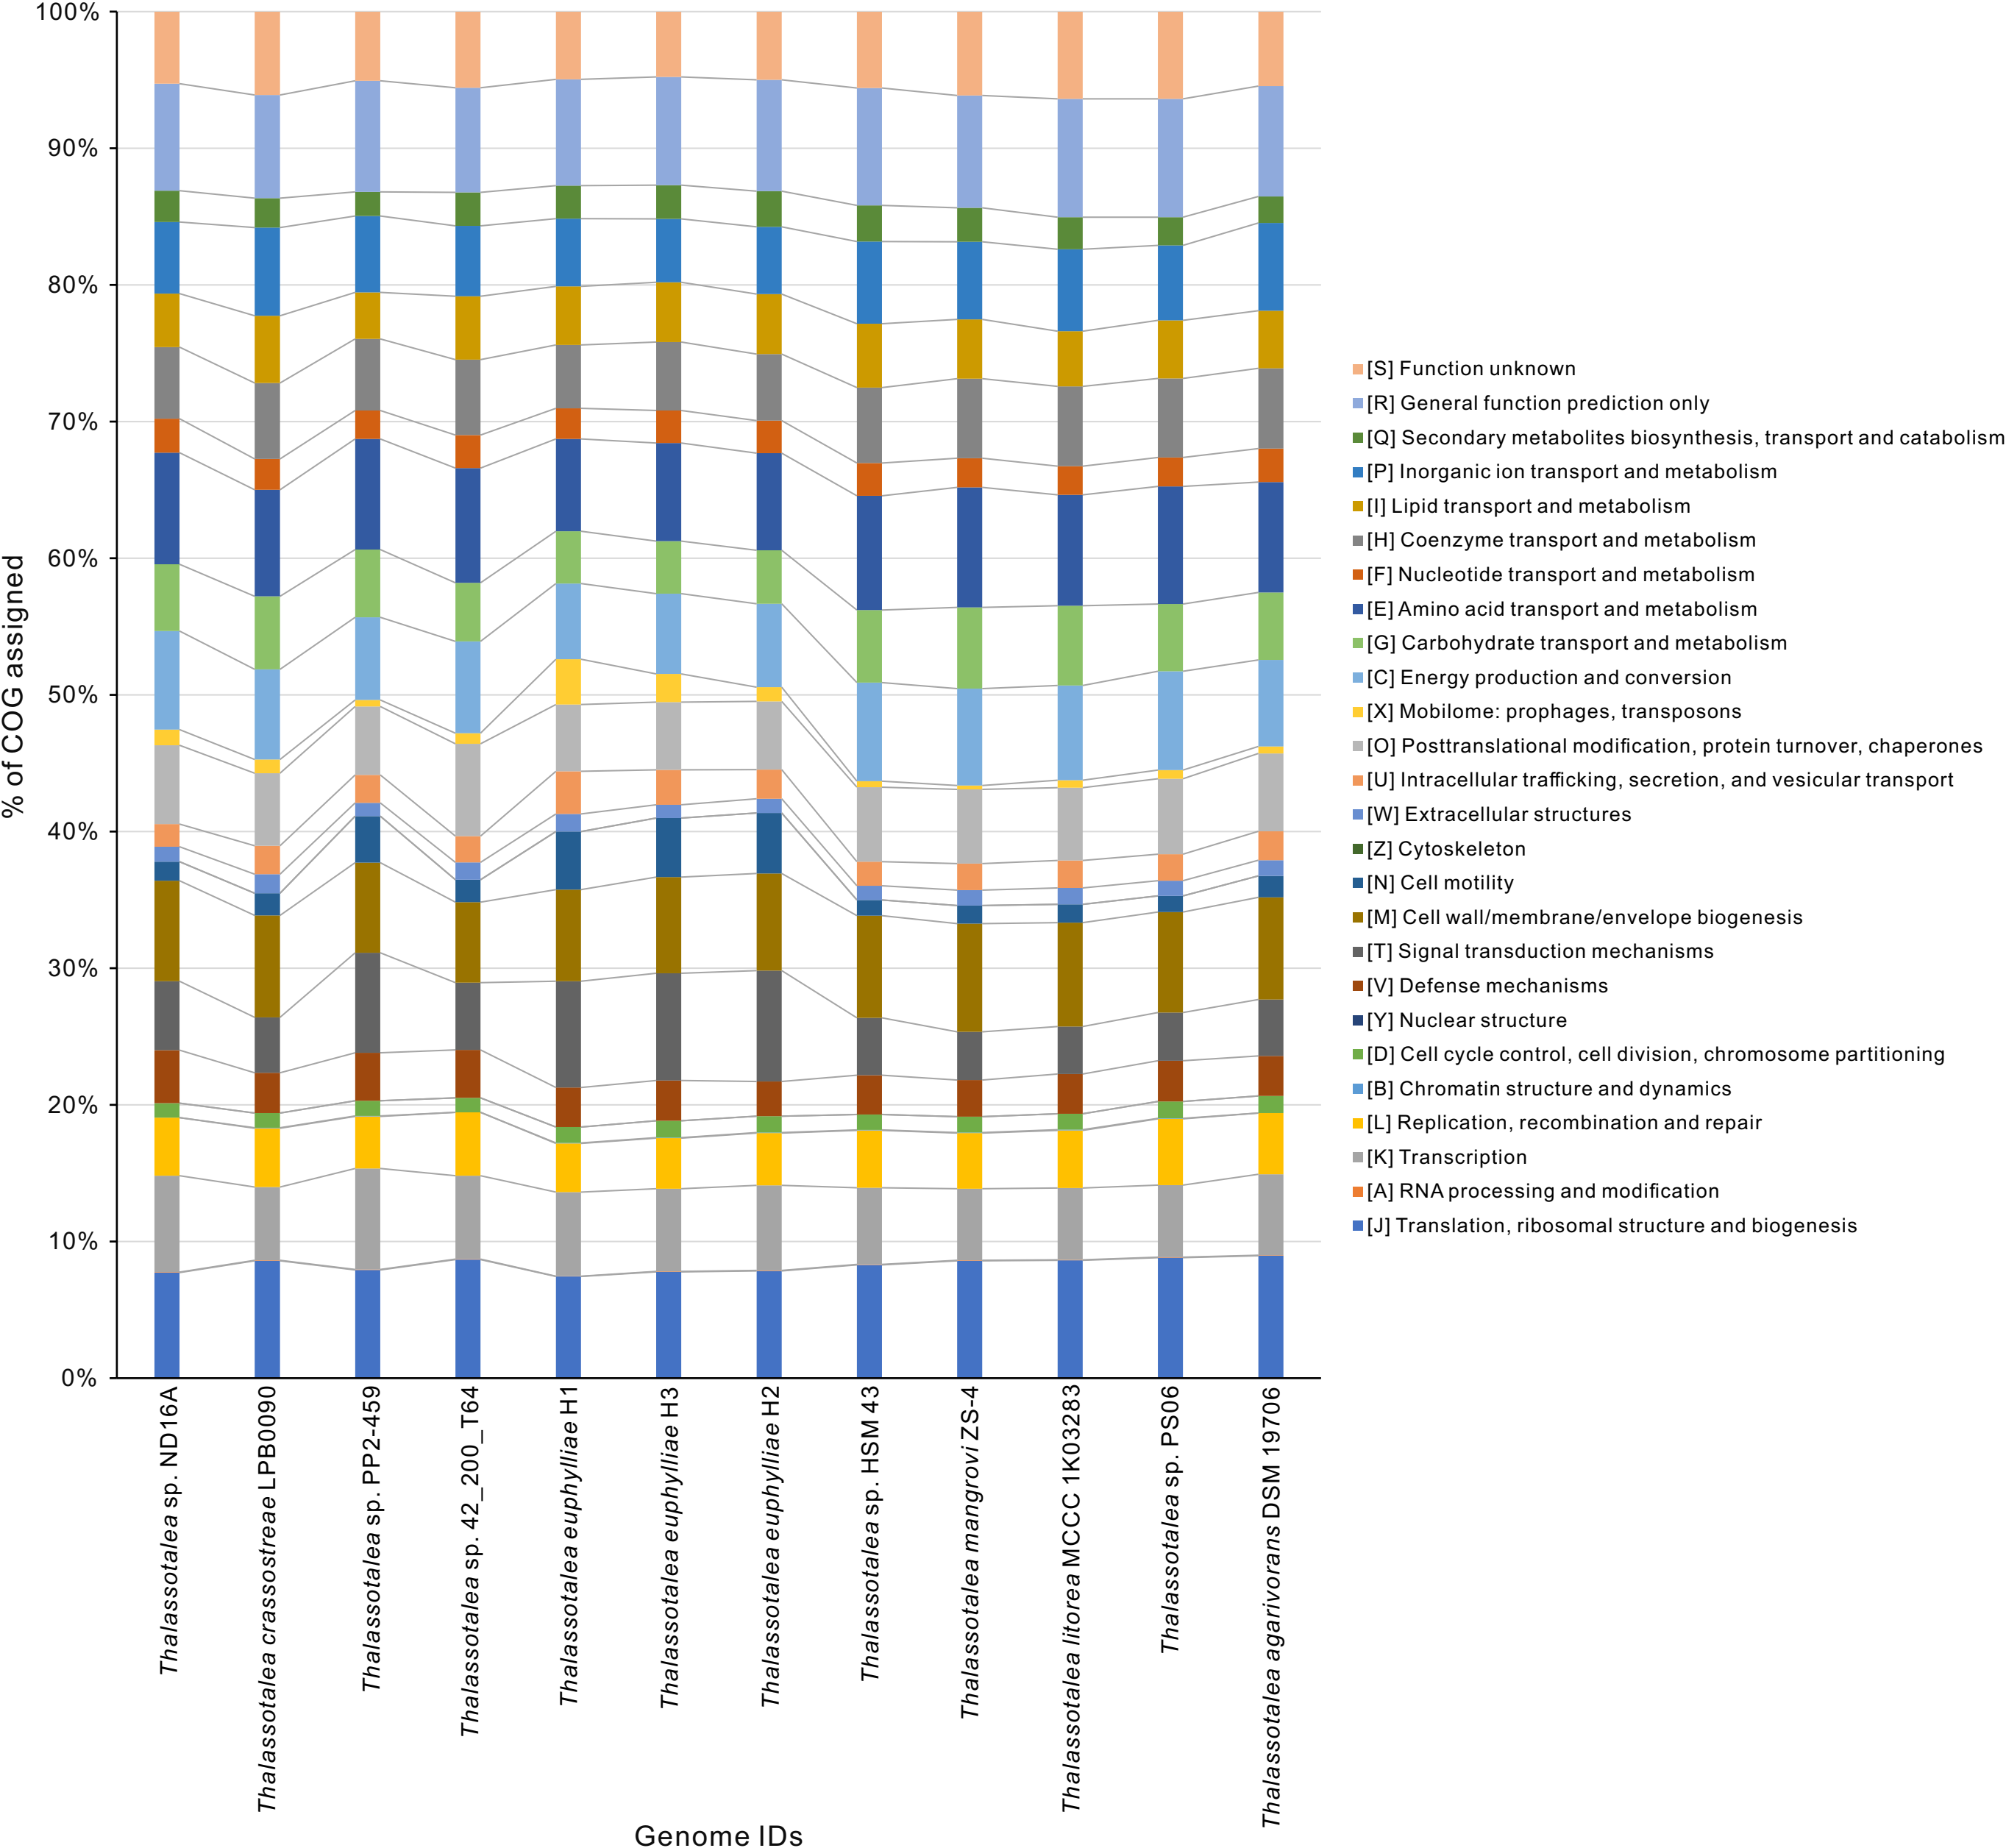

Supplement: s1 [file s1]

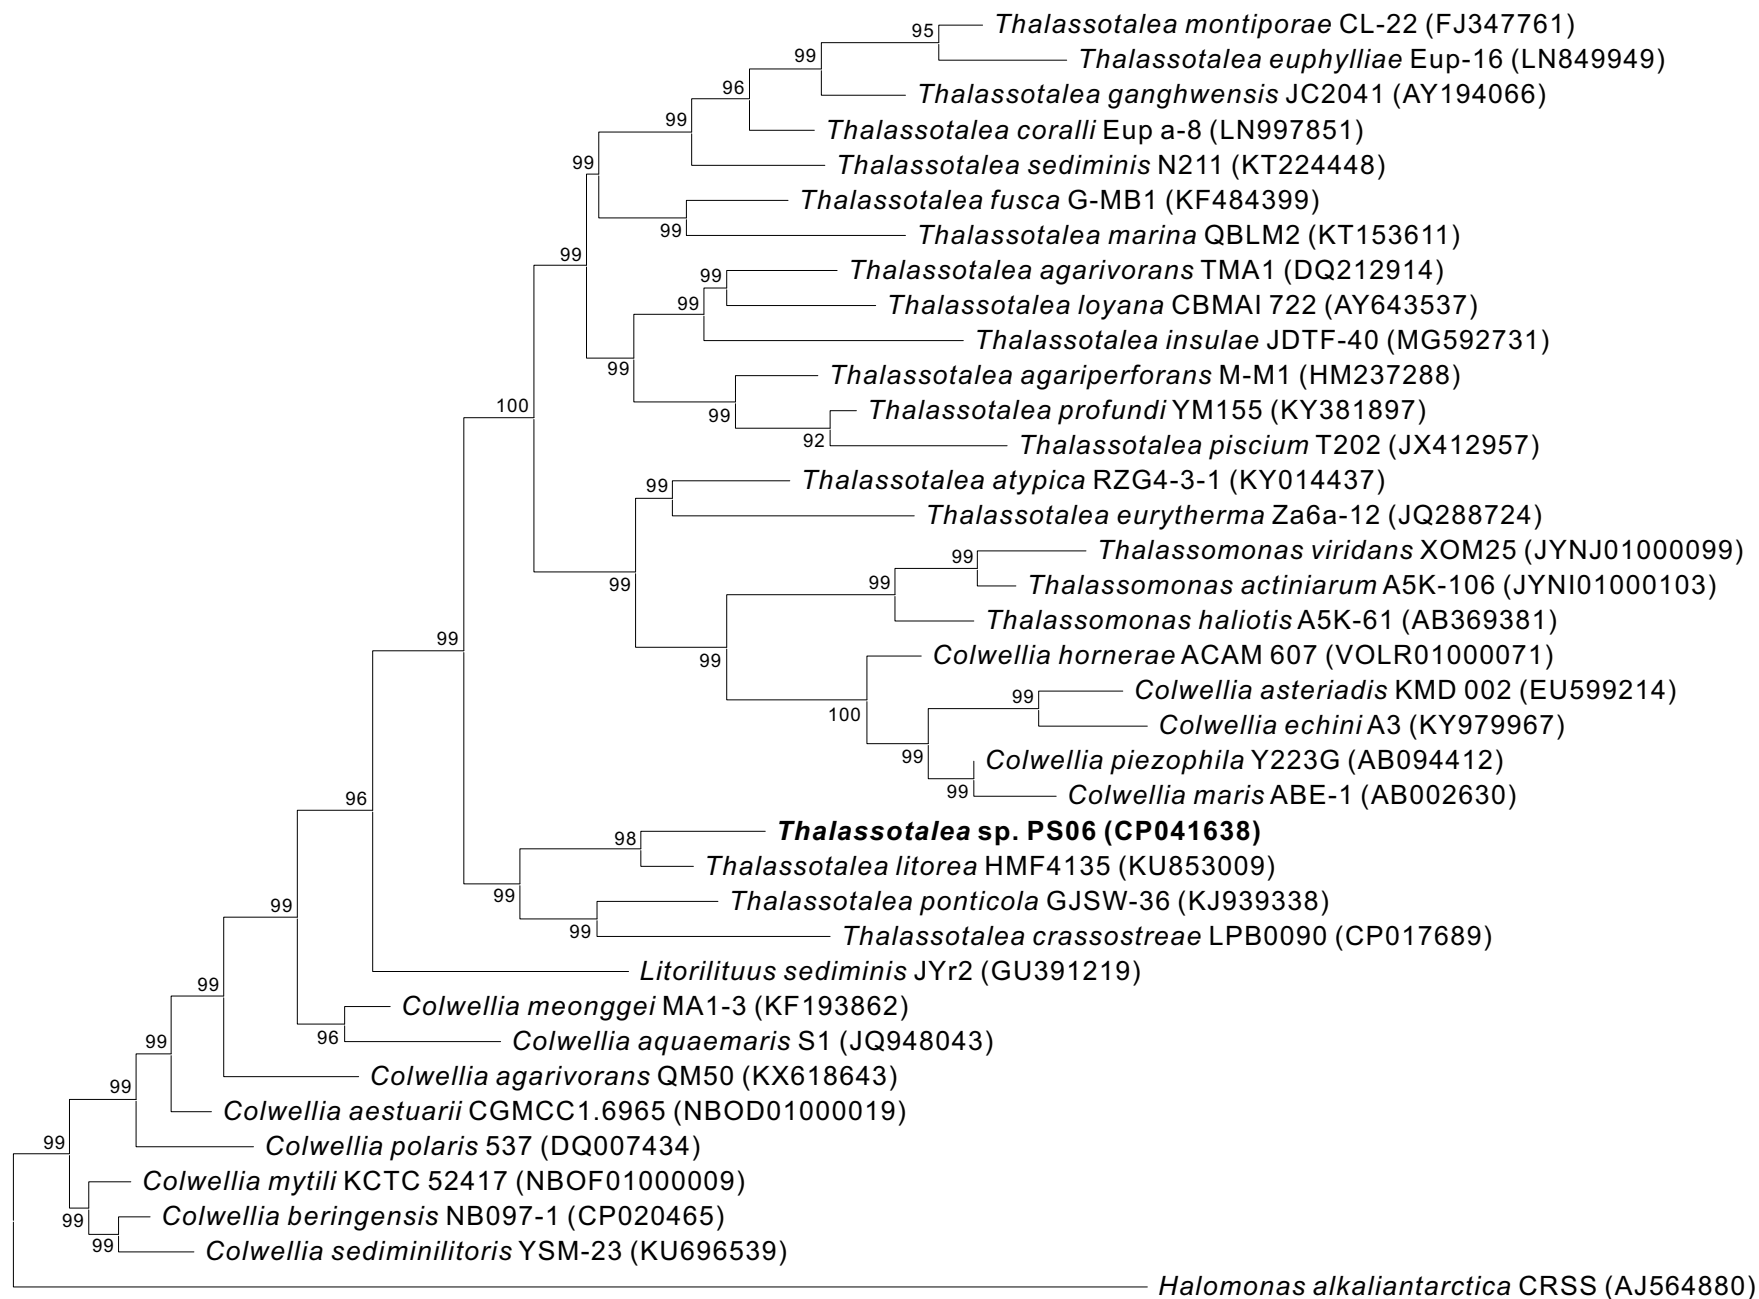

0.02

Supplement: s1 [file s1]
